# Supplementary material for: Beta-blockers reduce severe exacerbation in patients with mild chronic obstructive pulmonary disease with atrial fibrillation: a population-based cohort study
Source: HighWire-hosted journal article supplement (doi:10.1136/bmjresp-2023-001854), 2023-11-01
Supplement: bmjresp-2023-001854supp001_data_supplement.pdf [file bmjresp-2023-001854supp001_data_supplement.pdf]

**Supplemental material****Supplemental Table 1.** Anatomical Therapeutic Chemical (ATC) codes of index drugs

| Classification     | Generic name                 | ATC code |
|--------------------|------------------------------|----------|
| Cardioselective BB | Metoprolol                   | C07AB02  |
|                    | Atenolol                     | C07AB03  |
|                    | Bisoprolol                   | C07AB07  |
|                    | Nebivolol                    | C07AB12  |
|                    | Atenolol and thiazides       | C07BB03  |
|                    | Atenolol and other diuretics | C07CB03  |
| Non-selective BB   | Labetalol                    | C07AG01  |
|                    | Carvedilol                   | C07AG02  |
|                    | Propranolol                  | C07AA05  |
| Non-DHP CCB        | Verapamil                    | C08DA01  |
|                    | Diltiazem                    | C08DB01  |

BB, beta-blocker; non-DHP CCB, non-dihydropyridine calcium channel blocker.

**Supplemental Table 2.** International Classification of Diseases (ICD) codes of comorbidities

| <b>Comorbidities</b>        | <b>ICD-9</b>                                                                                                                                                                                                                                                                                                           | <b>ICD-10</b>          |
|-----------------------------|------------------------------------------------------------------------------------------------------------------------------------------------------------------------------------------------------------------------------------------------------------------------------------------------------------------------|------------------------|
| Hypertension                | 401–404                                                                                                                                                                                                                                                                                                                | I10–I15                |
| Heart failure               | 428                                                                                                                                                                                                                                                                                                                    | I50                    |
| Myocardial infarction       | 410, 412                                                                                                                                                                                                                                                                                                               | I21, I22, I25.2        |
| Coronary revascularization* | 68023A, 68023B, 68024A, 68024B, 68025A, 68025B, 68053B, 68054B, 68055B 83064A1, 97901K, 97902A, 97903B, 97906K, 97907A, 97908B, 97911K, 97912A, 97913B, 97916K, 97917A, 97918B, 33076A, 33076B, 33077A, 33077B, 33078A, 33078B, 97511K, 97512A, 97513B, 97516K, 97517A, 97518B, 97521K, 97522A, 97523B, N26002, N26003 |                        |
| Ischemic heart disease      | 411, 413, 414                                                                                                                                                                                                                                                                                                          | I20, I24, I25.1, I25.7 |
| Cardiac dysrhythmia         | 427 except 427.3                                                                                                                                                                                                                                                                                                       | I47, I49               |
| Cerebrovascular disease     | 430–438                                                                                                                                                                                                                                                                                                                | I60–I64, G458, G459    |
| Hyperthyroidism             | 242                                                                                                                                                                                                                                                                                                                    | E05                    |
| Hypothyroidism              | 244.9                                                                                                                                                                                                                                                                                                                  | E03.9                  |
| Diabetes mellitus           | 250                                                                                                                                                                                                                                                                                                                    | E10–E14                |
| Dyslipidemia                | 272.0–272.5, 272.8, 272.9                                                                                                                                                                                                                                                                                              | E78                    |

---

|                        |         |         |
|------------------------|---------|---------|
| Chronic kidney disease | 585     | N18     |
| Pulmonary hypertension | 416     | I27.0   |
| Cancer                 | 140–208 | C00–C97 |

---

\* Coronary revascularization was identified using procedure codes from the National Health Insurance Database

**Supplemental Table 3.** Anatomical Therapeutic Chemical (ATC) Codes of Co-mediations

| <b>Co-medication</b>               | <b>ATC Codes</b>                                                       |
|------------------------------------|------------------------------------------------------------------------|
| COPD medication                    |                                                                        |
| Long-acting inhalation medication  |                                                                        |
| LABA+LAMA+ICS                      | Both one of LAMA and one of LABA+ICS using at the same time            |
| LABA+LAMA                          | R03AL03, R03AL04, R03AL05, R03AL06, R03AL07, R03AL08                   |
| LABA+ICS                           | R03AK06, R03AK07, R03AK08, R03AK09, R03AK10, R03AK11, R03AK12, R03AK14 |
| LABA                               | R03AC12, R03AC13, R03AC16, R03AC18, R03AC19                            |
| LAMA                               | R03BB04, R03BB05, R03BB06, R03BB07                                     |
| Short-acting inhalation medication |                                                                        |
| SABA                               | R03AC02, R03AC03, R03AC04, R03AC06                                     |
| SAMA                               | R03BB01                                                                |
| SABA+SAMA                          | R03AL01, R03AL02                                                       |
| Xanthine                           | R03DA01, R03DA02, R03DA03, R03DA04, R03DA05, R03DA51, R03DA54          |
| Systemic steroid                   | H02A, H02B                                                             |
| Cardiovascular medication          |                                                                        |
| Antiplatelet                       | B01AA, B01AE, B01AF                                                    |
| Anticoagulant                      | B01AC                                                                  |

---

|                             |                      |
|-----------------------------|----------------------|
| Class I                     | C01BA, C01BB, C01BC  |
| Amiodarone                  | C01BD01              |
| Class III except amiodarone | C01BD EXCEPT C01BD01 |
| ACEI/ARB                    | C09                  |
| Statin                      | C10AA                |
| Diabetes medication         | A10                  |

---

**Supplemental Table 4.** Subdistribution Hazard Ratios (SHR) of after-matching cohort

|                   | SHR (95% CI)     |
|-------------------|------------------|
| BB                | 0.84 (0.76–0.94) |
| non-DHP CCB (ref) | 1                |
| Mild COPD         |                  |
| BB                | 0.80 (0.70–0.91) |
| non-DHP CCB (ref) | 1                |
| Severe COPD       |                  |
| BB                | 1.05 (0.87–1.27) |
| non-DHP CCB (ref) | 1                |

BB, beta blocker; CI, confidence interval; COPD, chronic obstructive pulmonary disease;

non-DHB CCB, non-dihydropyridine calcium channel blockers PS, propensity score;

SMD, standardized mean difference

**Supplemental Table 5.** Proportion of spirometry test at different timing in selected cohort, data presented as n (%)

| Intervention                              | Before PS matching |                  |      | After PS matching |                  |       |
|-------------------------------------------|--------------------|------------------|------|-------------------|------------------|-------|
|                                           | BB<br>(n=7,590)    | CCB<br>(n=5,872) | SMD  | BB<br>(n=4,480)   | CCB<br>(n=4,480) | SMD   |
| Within 2 years before COPD diagnosis date |                    |                  |      |                   |                  |       |
|                                           | 1,053<br>(13.9%)   | 1,022<br>(17.4%) | -0.1 | 687<br>(15.3%)    | 712<br>(15.9%)   | -0.02 |
| From COPD diagnosis date to index date    |                    |                  |      |                   |                  |       |
|                                           | 2,539<br>(33.45%)  | 1,894<br>(32.3%) | 0.03 | 1,486<br>(33.1%)  | 1,447<br>(32.3)  | 0.02  |
| Within 2 years before COPD to index date  |                    |                  |      |                   |                  |       |
|                                           | 3,060<br>(40.3%)   | 2,403<br>(40.9)  | -0   | 1,836<br>(40.9%)  | 1,807<br>(40.3%) | 0.01  |

BB, beta blocker; COPD, chronic obstructive pulmonary disease; SMD, standardized mean difference
