# Supplementary figures and images for: Beta-blockers reduce severe exacerbation in patients with mild chronic obstructive pulmonary disease with atrial fibrillation: a population-based cohort study
Source: HighWire-hosted journal article supplement (doi:10.1136/bmjresp-2023-001854), 2023-11-01

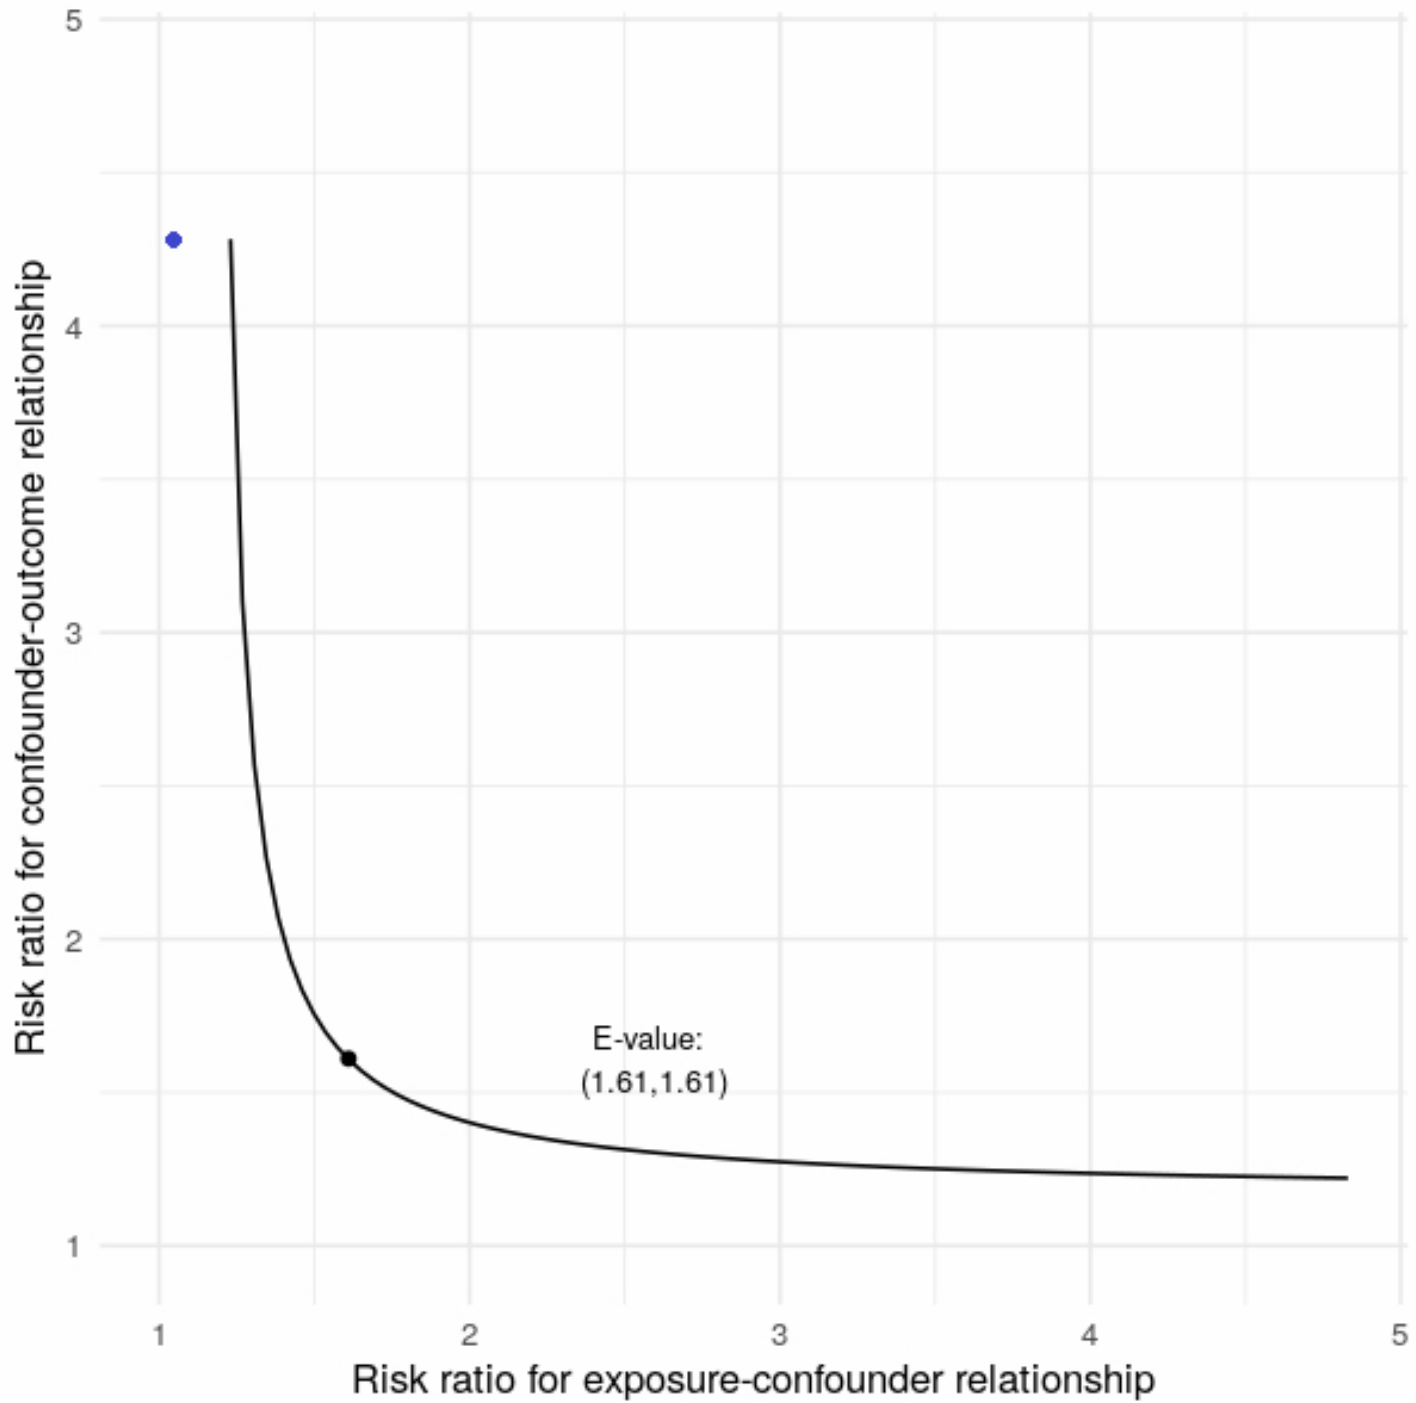

Supplement: bmjresp-2023-001854supp002_data_supplement.pdf [file bmjresp-2023-001854supp002_data_supplement.pdf]
